# Supplementary material for: The Look AHEAD Trial: Bone Loss at 4-Year Follow-up in Type 2 Diabetes
Source: Oxford University Press journal article supplement (doi:10.2337/dc14-0762), 2014-07-22
Supplement: dc140762supplementarydata.pdf [file dc140762supplementarydata.pdf]

SUPPLEMENTARY DATA

**Supplementary Figure 1.** Flow diagram of subject disposition in the current study

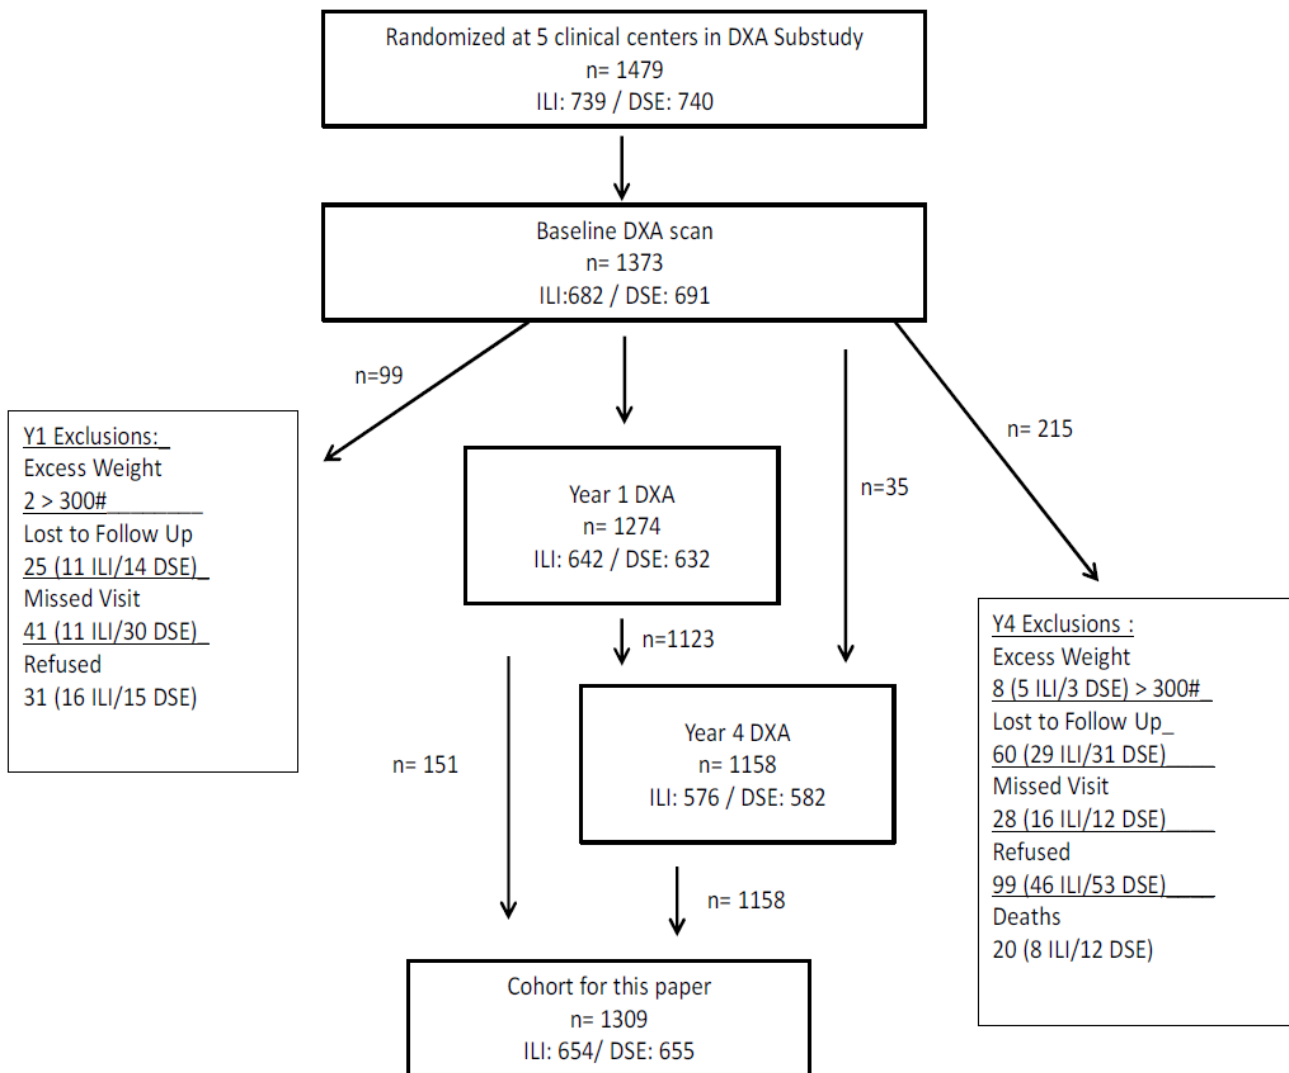

SUPPLEMENTARY DATA

**Supplementary Table 2.** Baseline Data Comparing Non-DXA to DXA cohort from the Look AHEAD Trial

| Variable**                                | OVERALL           |             |         | BY GENDER         |              |         |                   |             |         |
|-------------------------------------------|-------------------|-------------|---------|-------------------|--------------|---------|-------------------|-------------|---------|
|                                           | Non DXA LA cohort | DXA cohort  | P-value | Non DXA LA cohort | DXA cohort   | P-value | Non DXA LA cohort | DXA cohort  | P-value |
| Number                                    | 3836              | 1309        |         | 1591              | 491          |         | 2245              | 818         |         |
| Age (years)                               | 58.8 (6.9)        | 58.4 (6.6)  | 0.069   | 59.8 (6.8)        | 60.2 (6.4)   | 0.322   | 58.1 (6.9)        | 57.4 (6.5)  | 0.008   |
| Ethnicity (number, %)                     |                   |             |         |                   |              |         |                   |             |         |
| Black                                     | 667 (17%)         | 137 (10%)   | <.001   | 163 (10.2%)       | 26 (5.3%)    | <.001   | 504 (22.4%)       | 111 (13.6%) | <.001   |
| White                                     | 2493 (65%)        | 759 (58%)   |         | 1233 (77.5%)      | 351 (71.5%)  |         | 1257 (56.1%)      | 411 (50.1%) |         |
| Other                                     | 675 (18%)         | 413 (32%)   |         | 195 (12.3%)       | 114 (23.2%)  |         | 483 (21.5%)       | 296 (36.3%) |         |
| Height (cm)                               | 167.7 (9.7)       | 165.8 (9.8) | <.001   | 176.2 (6.7)       | 174.9 (6.8)  | <.001   | 161.7 (6.3)       | 160.3 (6.8) | <.001   |
| Weight (kg)                               | 102.0 (19.9)      | 96.9 (16.7) | <.001   | 110.5 (19.3)      | 103.9 (14.8) | <.001   | 95.9 (18.0)       | 92.7 (16.4) | <.001   |
| BMI (kg/m <sup>2</sup> )                  | 36.2 (6.1)        | 35.2 (5.3)  | <.001   | 35.6 (5.7)        | 34.0 (4.4)   | <.001   | 36.6 (6.3)        | 36.0 (5.6)  | 0.008   |
| Thiazolidinedione use (number yes, % yes) | 1071 (28%)        | 253 (19%)   | <.001   | 481 (31.5%)       | 122 (24.9%)  | 0.005   | 591 (27.5%)       | 130 (16.0%) | <.001   |
| Bisphosphonate use (number yes, % yes)    | 73 (1.9%)         | 18 (1.4%)   | 0.215   | 4 (0.3%)          | 1 (0.2%)     | 0.85    | 69 (3.1%)         | 17 (2.1%)   | 0.145   |
| Fitness (METs)                            | 5.1 (1.5)         | 5.3 (1.5)   | <.001   | 5.6 (1.6)         | 5.9 (1.6)    | 0.006   | 4.7 (1.3)         | 5.0 (1.3)   | <.001   |
| Smoking status (number yes, % yes)        |                   |             |         |                   |              |         |                   |             |         |
| Never                                     | 1859 (49%)        | 717 (55%)   | <.001   | 589 (37.0%)       | 192 (39.1%)  | 0.309   | 1270 (56.5%)      | 526 (64.4%) | <.001   |
| Past                                      | 1809 (47%)        | 531 (41%)   |         | 933 (58.7%)       | 272 (55.4%)  |         | 876 (39.1%)       | 259 (31.6%) |         |
| Present                                   | 167 (4%)          | 60 (5%)     |         | 68 (4.3%)         | 27 (5.5%)    |         | 99 (4.4%)         | 33 (4.1%)   |         |
| Alcohol in past year (number yes, % yes)  | 2358 (62%)        | 724 (55%)   | <.001   | 1135 (71.4%)      | 337 (68.6%)  | 0.242   | 1224 (54.5%)      | 386 (47.4%) | <.001   |
| Menopausal status (number, %)             |                   |             |         |                   |              |         |                   |             |         |
| Post-menopausal                           | 1685 (75%)        | 608 (74%)   | 0.136   | --                | --           | --      | 1685 (75.1%)      | 608 (74%)   | 0.136   |
| Pre-menopausal                            | 292 (13%)         | 93 (11%)    |         | --                | --           |         | 292 (13.0%)       | 93 (11%)    |         |

SUPPLEMENTARY DATA

|                                                                            |           |           |       |           |           |       |             |           |       |
|----------------------------------------------------------------------------|-----------|-----------|-------|-----------|-----------|-------|-------------|-----------|-------|
| Unknown                                                                    | 268 (12%) | 117 (14%) |       | --        | --        |       | 268 (11.9%) | 117 (14%) |       |
| Proteinuria- mg albumin/mg creatinine $\geq$ 0.3 on spot urine (number, %) | 111 (3%)  | 32 (3%)   | 0.336 | 67 (4.4%) | 9 (1.9%)  | 0.012 | 44 (2.0%)   | 23 (2.9%) | 0.175 |
| A1c, %                                                                     | 7.3 (1.2) | 7.3 (1.2) | 0.313 | 7.3 (1.2) | 7.2 (1.2) | 0.617 | 7.3 (1.1)   | 7.3 (1.2) | 0.114 |
| Mmol/mol                                                                   | 55 (13)   | 55 (13)   |       | 55 (13)   | 55 (13)   |       |             |           |       |

\*\* Mean (standard deviation) for continuous measures; frequency (percent) for categorical measures

# Diet data was only collected on a subset of the LA cohort. Ns for Calcium intake are: Non-DXA = 2049; M = 864; F = 1185 \ DXA = 708; M = 258; F = 450

## SUPPLEMENTARY DATA

### **Clinical Sites**

The Johns Hopkins Medical Institutions Frederick L. Brancati, MD, MHS<sup>1</sup>; Lee Swartz<sup>2</sup>; Lawrence Cheskin, MD<sup>3</sup>; Jeanne M. Clark, MD, MPH<sup>3</sup>; Kerry Stewart, EdD<sup>3</sup>; Richard Rubin, PhD<sup>3</sup>; Jean Arceci, RN; Suzanne Ball; Jeanne Charleston, RN; Danielle Diggins; Mia Johnson; Joyce Lambert; Kathy Michalski, RD; Dawn Jiggetts; Chanchai Sapun

Pennington Biomedical Research Center George A. Bray, MD<sup>1</sup>; Kristi Rau<sup>2</sup>; Allison Strate, RN<sup>2</sup>; Frank L. Greenway, MD<sup>3</sup>; Donna H. Ryan, MD<sup>3</sup>; Donald Williamson, PhD<sup>3</sup>; Brandi Armand, LPN; Jennifer Arceneaux; Amy Bachand, MA; Michelle Begnaud, LDN, RD, CDE; Betsy Berhard; Elizabeth Caderette; Barbara Cerniauskas, LDN, RD, CDE; David Creel, MA; Diane Crow; Crystal Duncan; Helen Guay, LDN, LPC, RD; Carolyn Johnson, Lisa Jones; Nancy Kora; Kelly LaFleur; Kim Landry; Missy Lingle; Jennifer Perault; Cindy Puckett; Mandy Shipp, RD; Marisa Smith; Elizabeth Tucker

The University of Alabama at Birmingham Cora E. Lewis, MD, MSPH<sup>1</sup>; Sheikilya Thomas MPH<sup>2</sup>; Monika Safford, MD<sup>3</sup>; Vicki DiLillo, PhD; Charlotte Bragg, MS, RD, LD; Amy Dobelstein; Stacey Gilbert, MPH; Stephen Glasser, MD<sup>3</sup>; Sara Hannum, MA; Anne Hubbell, MS; Jennifer Jones, MA; DeLavallade Lee; Ruth Luketic, MA, MBA, MPH; L. Christie Oden; Janet Raines, MS; Cathy Roche, RN, BSN; Janet Truman; Nita Webb, MA; Casey Azuero, MPH; Jane King, MLT; Andre Morgan

### **Harvard Center**

*Massachusetts General Hospital.* David M. Nathan, MD<sup>1</sup>; Enrico Cagliero, MD<sup>3</sup>; Kathryn Hayward, MD<sup>3</sup>; Heather Turgeon, RN, BS, CDE<sup>2</sup>; Linda Delahanty, MS, RD<sup>3</sup>; Ellen Anderson, MS, RD<sup>3</sup>; Laurie Bissett, MS, RD; Valerie Goldman, MS, RD; Virginia Harlan, MSW; Theresa Michel, DPT, DSc, CCS; Mary Larkin, RN; Christine Stevens, RN; Kylee Miller, BA; Jimmy Chen, BA; Karen Blumenthal, BA; Gail Winning, BA; Rita Tsay, RD; Helen Cyr, RD; Maria Pinto

*Joslin Diabetes Center.* Edward S. Horton, MD<sup>1</sup>; Sharon D. Jackson, MS, RD, CDE<sup>2</sup>; Osama Hamdy, MD, PhD<sup>3</sup>; A. Enrique Caballero, MD<sup>3</sup>; Sarah Bain, BS; Elizabeth Bovaird, BSN, RN; Barbara Fargnoli, MS, RD; Jeanne Spellman, BS, RD; Ann Goebel-Fabbri, PhD; Lori Lambert, MS, RD; Sarah Ledbury, MEd, RD; Maureen Malloy, BS; Kerry Ovale, MS, RCEP, CDE

*Beth Israel Deaconess Medical Center.* George Blackburn, MD, PhD<sup>1</sup>; Christos Mantzoros, MD, DSc<sup>3</sup>; Ann McNamara, RN; Kristina Spellman, RD

University of Colorado Health Sciences Center James O. Hill, PhD<sup>1</sup>; Marsha Miller, MS, RD<sup>2</sup>; Brent Van Dorsten, PhD<sup>3</sup>; Judith Regensteiner, PhD<sup>3</sup>; Ligia Coelho, BS; Paulette Cohrs, RN, BSN; Susan Green; April Hamilton, BS, CCRC; Jere Hamilton, BA; Eugene Leshchinskiy; Lindsey Munkwitz, BS; Loretta Rome, TRS; Terra Worley, BA; Kirstie Craul, RD, CDE; Sheila Smith, BS

## SUPPLEMENTARY DATA

Baylor College of Medicine John P. Foreyt, PhD<sup>1</sup>; Rebecca S. Reeves, DrPH, RD<sup>2</sup>; Henry Pownall, PhD<sup>3</sup>; Ashok Balasubramanyam, MBBS<sup>3</sup>; Peter Jones, MD<sup>3</sup>; Michele Burrington, RD, RN; Chu-Huang Chen, MD, PhD<sup>3</sup>; Allyson Clark Gardner, MS, RD; Molly Gee, MEd, RD; Sharon Griggs; Michelle Hamilton; Veronica Holley; Jayne Joseph, RD; Julieta Palencia, RN; Jennifer Schmidt; Carolyn White

### The University of Tennessee Health Science Center

*University of Tennessee East.* Karen C. Johnson, MD, MPH<sup>1</sup>; Carolyn Gresham, RN<sup>2</sup>; Stephanie Connelly, MD, MPH<sup>3</sup>; Amy Brewer, RD, MS; Mace Coday, PhD; Lisa Jones, RN; Lynne Lichtermann, RN, BSN; Shirley Vosburg, RD, MPH; and J. Lee Taylor, MEd, MBA

*University of Tennessee Downtown.* Abbas E. Kitabchi, PhD, MD<sup>1</sup>; Ebenezer Nyenwe, MD<sup>3</sup>; Helen Lambeth, RN, BSN<sup>2</sup>; Amy Brewer, MS, RD, LDN; Debra Clark, LPN; Andrea Crisler, MT; Debra Force, MS, RD, LDN; Donna Green, RN; Robert Kores, PhD

University of Minnesota Robert W. Jeffery, PhD<sup>1</sup>; Carolyn Thorson, CCRP<sup>2</sup>; John P. Bantle, MD<sup>3</sup>; J. Bruce Redmon, MD<sup>3</sup>; Richard S. Crow, MD<sup>3</sup>; Scott Crow, MD<sup>3</sup>; Susan K Raatz, PhD, RD<sup>3</sup>; Kerrin Brelje, MPH, RD; Carolyn Campbell; Jeanne Carls, MEd; Tara Carmean-Mihm, BA; Julia Devonish, MS; Emily Finch, MA; Anna Fox, MA; Elizabeth Hoelscher, MPH, RD, CHES; La Donna James; Vicki A. Maddy, BS, RD; Therese Ockenden, RN; Birgitta I. Rice, MS, RPh, CHES; Tricia Skarphol, BS; Ann D. Tucker, BA; Mary Susan Voeller, BA; Cara Walcheck, BS, RD

St. Luke's Roosevelt Hospital Center Xavier Pi-Sunyer, MD<sup>1</sup>; Jennifer Patricio, MS<sup>2</sup>; Stanley Heshka, PhD<sup>3</sup>; Carmen Pal, MD<sup>3</sup>; Lynn Allen, MD; Lolline Chong, BS, RD; Marci Gluck, PhD; Diane Hirsch, RNC, MS, CDE; Mary Anne Holowaty, MS, CN; Michelle Horowitz, MS, RD; Nancy Rau, MS, RD, CDE; Dori Brill Steinberg, BS

University of Pennsylvania Thomas A. Wadden, PhD<sup>1</sup>; Barbara J Maschak- Carey, MSN, CDE<sup>2</sup>; Robert I. Berkowitz, MD<sup>3</sup>; Seth Braunstein, MD, PhD<sup>3</sup>; Gary Foster, PhD<sup>3</sup>; Henry Glick, PhD<sup>3</sup>; Shiriki Kumanyika, PhD, RD, MPH<sup>3</sup>; Stanley S. Schwartz, MD<sup>3</sup>; Michael Allen, RN; Yuliis Bell; Johanna Brock; Susan Brozena, MD; Ray Carvajal, MA; Helen Chomentowski; Canice Crerand, PhD; Renee Davenport; Andrea Diamond, MS, RD; Anthony Fabricatore, PhD; Lee Goldberg, MD; Louise Hesson, MSN, CRNP; Thomas Hudak, MS; Nayyar Iqbal, MD; LaShanda Jones-Corneille, PhD; Andrew Kao, MD; Robert Kuehnel, PhD; Patricia Lipschutz, MSN; Monica Mullen, RD, MPH

University of Pittsburgh John M. Jakicic, PhD<sup>1</sup>; David E. Kelley, MD<sup>1</sup>; Jacqueline Wesche-Thobaben, RN, BSN, CDE<sup>2</sup>; Lewis H. Kuller, MD, DrPH<sup>3</sup>; Andrea Kriska, PhD<sup>3</sup>; Amy D. Otto, PhD, RD, LDN<sup>3</sup>; Lin Ewing, PhD, RN<sup>3</sup>; Mary Korytkowski, MD<sup>3</sup>; Daniel Edmundowicz, MD<sup>3</sup>; Monica E. Yamamoto, DrPH, RD, FADA<sup>3</sup>; Rebecca Danchenko, BS; Barbara Elnyczky; David O. Garcia, MS; George A. Grove, MS; Patricia H. Harper, MS, RD, LDN; Susan Harrier, BS; Nicole L. Helbling, MS, RN; Diane Ives, MPH; Juliet Mancino, MS, RD, CDE, LDN; Anne Mathews, PhD, RD, LDN; Tracey Y. Murray, BS; Joan R. Ritchea; Susan Urda, BS, CTR; Donna L. Wolf, PhD

## SUPPLEMENTARY DATA

The Miriam Hospital/Brown Medical School Rena R. Wing, PhD<sup>1</sup>; Renee Bright, MS<sup>2</sup>; Vincent Pera, MD<sup>3</sup>; John Jakicic, PhD<sup>3</sup>; Deborah Tate, PhD<sup>3</sup>; Amy Gorin, PhD<sup>3</sup>; Kara Gallagher, PhD<sup>3</sup>; Amy Bach, PhD; Barbara Bancroft, RN, MS; Anna Bertorelli, MBA, RD; Richard Carey, BS; Tatum Charron, BS; Heather Chenot, MS; Kimberley Chula-Maguire, MS; Pamela Coward, MS, RD; Lisa Cronkite, BS; Julie Currin, MD; Maureen Daly, RN; Caitlin Egan, MS; Erica Ferguson, BS, RD; Linda Foss, MPH; Jennifer Gauvin, BS; Don Kieffer, PhD; Lauren Lessard, BS; Deborah Maier, MS; JP Massaro, BS; Tammy Monk, MS; Rob Nicholson, PhD; Erin Patterson, BS; Suzanne Phelan, PhD; Hollie Raynor, PhD, RD; Douglas Raynor, PhD; Natalie Robinson, MS, RD; Deborah Robles; Jane Tavares, BS

The University of Texas Health Science Center at San Antonio Steven M. Haffner, MD<sup>1</sup>; Helen P. Hazuda, Ph.D.<sup>1</sup>; Maria G. Montez, RN, MSHP, CDE<sup>2</sup>; Carlos Lorenzo, MD<sup>3</sup>; Charles F. Coleman, MS, RD; Domingo Granado, RN; Kathy Hathaway, MS, RD; Juan Carlos Isaac, RC, BSN; Nora Ramirez, RN, BSN; Ronda Saenz, MS, RD

VA Puget Sound Health Care System / University of Washington Steven E. Kahn, MB, ChB<sup>1</sup>; Brenda Montgomery, RN, MS, CDE<sup>2</sup>; Robert Knopp, MD<sup>3</sup>; Edward Lipkin, MD<sup>3</sup>; Dace Trence, MD<sup>3</sup>; Terry Barrett, BS; Joli Bartell, BA; Diane Greenberg, PhD; Anne Murillo, BS; Betty Ann Richmond, MEd; Jolanta Socha, BS; April Thomas, MPH, RD; Alan Wesley, BA

Southwestern American Indian Center, Phoenix, Arizona and Shiprock, New Mexico William C. Knowler, MD, DrPH<sup>1</sup>; Paula Bolin, RN, MC<sup>2</sup>; Tina Killean, BS<sup>2</sup>; Cathy Manus, LPN<sup>3</sup>; Jonathan Krakoff, MD<sup>3</sup>; Jeffrey M. Curtis, MD, MPH<sup>3</sup>; Justin Glass, MD<sup>3</sup>; Sara Michaels, MD<sup>3</sup>; Peter H. Bennett, MB, FRCP<sup>3</sup>; Tina Morgan<sup>3</sup>; Shandiin Begay, MPH; Paul Bloomquist, MD; Teddy Costa, BS; Bernadita Fallis RN, RHIT, CCS; Jeanette Hermes, MS, RD; Diane F. Hollowbreast; Ruby Johnson; Maria Meacham, BSN, RN, CDE; Julie Nelson, RD; Carol Percy, RN; Patricia Poorthunder; Sandra Sangster; Nancy Scurlock, MSN, ANP-C, CDE; Leigh A. Shovestull, RD, CDE; Janelia Smiley; Katie Toledo, MS, LPC; Christina Tomchee, BA; Darryl Tonemah, PhD

University of Southern California Anne Peters, MD<sup>1</sup>; Valerie Ruelas, MSW, LCSW<sup>2</sup>; Siran Ghazarian, MD<sup>2</sup>; Kathryn (Mandy) Graves Hillstrom, EdD, RD, CDE; Kati Konersman, MA, RD, CDE; Sara Serafin-Dokhan

### **Coordinating Center**

Wake Forest University Mark A. Espeland, PhD<sup>1</sup>; Judy L. Bahnson, BA, CCRP<sup>3</sup>; Lynne E. Wagenknecht, DrPH<sup>3</sup>; David Reboussin, PhD<sup>3</sup>; W. Jack Rejeski, PhD<sup>3</sup>; Alain G. Bertoni, MD, MPH<sup>3</sup>; Wei Lang, PhD<sup>3</sup>; Michael S. Lawlor, PhD<sup>3</sup>; David Lefkowitz, MD<sup>3</sup>; Gary D. Miller, PhD<sup>3</sup>; Patrick S. Reynolds, MD<sup>3</sup>; Paul M. Ribisl, PhD<sup>3</sup>; Mara Vitolins, DrPH<sup>3</sup>; Haiying Chen, PhD<sup>3</sup>; Delia S. West, PhD<sup>3</sup>; Lawrence M. Friedman, MD<sup>3</sup>; Brenda L. Craven, MS, CCRP<sup>2</sup>; Kathy M. Dotson, BA<sup>2</sup>; Amelia Hodges, BS, CCRP<sup>2</sup>; Carrie C. Williams, MA, CCRP<sup>2</sup>; Andrea Anderson, MS; Jerry M. Barnes, MA; Mary Barr; Daniel P. Beavers, PhD; Tara Beckner; Cralen Davis, MS; Thania Del Valle-Fagan, MD; Patricia A. Feeney, MS; Candace Goode; Jason Griffin, BS; Lea Harvin, BS; Patricia Hogan, MS; Sarah A. Gaussoin, MS; Mark King, BS; Kathy Lane, BS; Rebecca H. Neiberg, MS; Michael P. Walkup, MS; Karen Wall; Terri Windham

## SUPPLEMENTARY DATA

### **Central Resources Centers**

DXA Reading Center, University of California at San Francisco Michael Nevitt, PhD<sup>1</sup>; Ann Schwartz, PhD<sup>2</sup>; John Shepherd, PhD<sup>3</sup>; Michaela Rahorst; Lisa Palermo, MS, MA; Susan Ewing, MS; Cynthia Hayashi; Jason Maeda, MPH

Central Laboratory, Northwest Lipid Metabolism and Diabetes Research Laboratories Santica M. Marcovina, PhD, ScD<sup>1</sup>; Jessica Chmielewski<sup>2</sup>; Vinod Gaur, PhD<sup>4</sup>

ECG Reading Center, EPICARE, Wake Forest University School of Medicine Elsayed Z. Soliman MD, MSc, MS<sup>1</sup>; Ronald J. Prineas, MD, PhD<sup>1</sup>; Charles Campbell<sup>2</sup>; Zhu-Ming Zhang, MD<sup>3</sup>; Teresa Alexander; Lisa Keasler; Susan Hensley; Yabing Li, MD

Diet Assessment Center, University of South Carolina, Arnold School of Public Health, Center for Research in Nutrition and Health Disparities Robert Moran, PhD<sup>1</sup>

Hall-Foushee Communications, Inc.  
Richard Foushee, PhD; Nancy J. Hall, MA

### **Federal Sponsors**

National Institute of Diabetes and Digestive and Kidney Diseases Mary Evans, PhD; Barbara Harrison, MS; Van S. Hubbard, MD, PhD; Susan Z. Yanovski, MD; Robert Kuczmarski, PhD

National Heart, Lung, and Blood Institute Lawton S. Cooper, MD, MPH; Peter Kaufman, PhD, FABMR

Centers for Disease Control and Prevention Edward W. Gregg, PhD; David F. Williamson, PhD; Ping Zhang, PhD
